# Supplementary material
Source: PubMed Central journal article supplement (PMC7116465)
Supplement: EMS106469-supplement-Supplementary_Note.pdf [file EMS106469-supplement-Supplementary_Note.pdf]

## Supplementary Note 1:

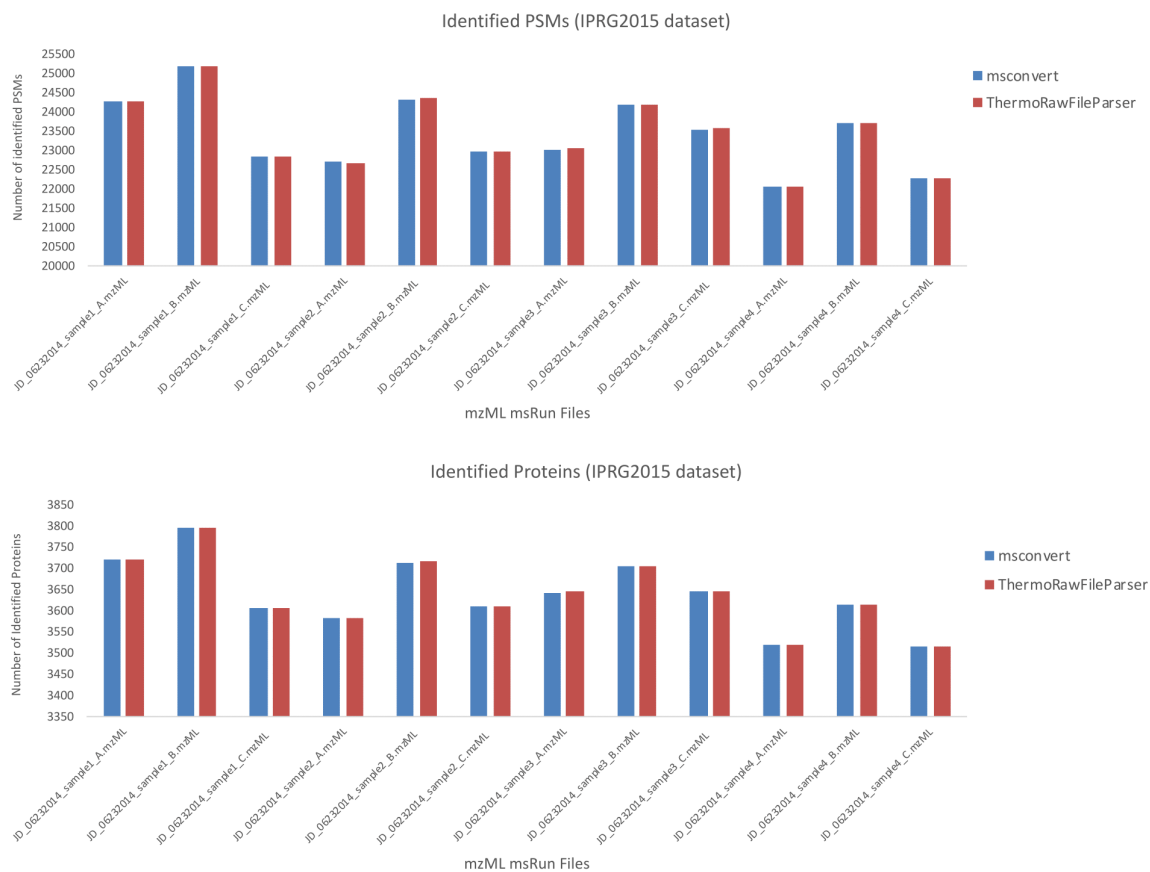

**Figure 1:** Number of identified PSMs (a) and proteins (b) where mzML are converted with msconvert (Proteowizard) and ThermoRawFileParser.
